# Supplementary material for: Effects of Land Use Changes from Paddy Fields on Soil Bacterial Communities in a Hilly and Mountainous Area
Source: PubMed Central journal article supplement (PMC4912151; doi:10.1264/jsme2.me15187), 2016-04-19

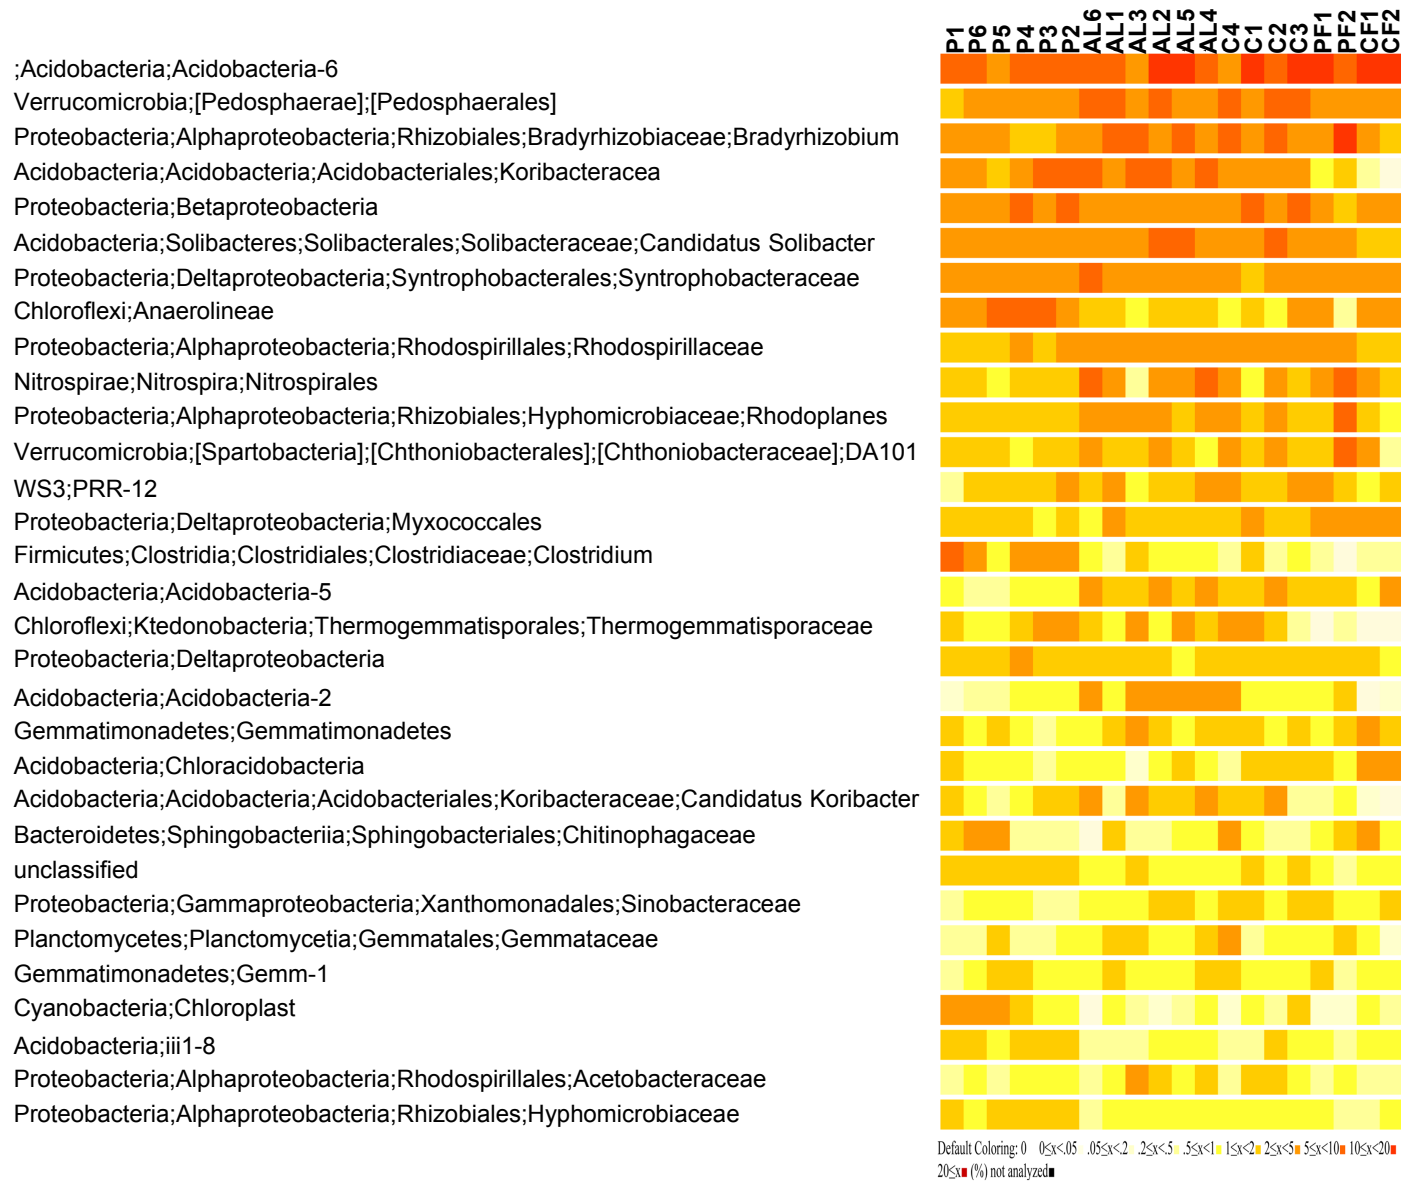

**Fig. S1.** The heat map analysis at genus level. The heat map was constructed with OTUMAMi using the taxonomic information from OTUs. Description of the soil samples has been provided in Fig. 1.

A

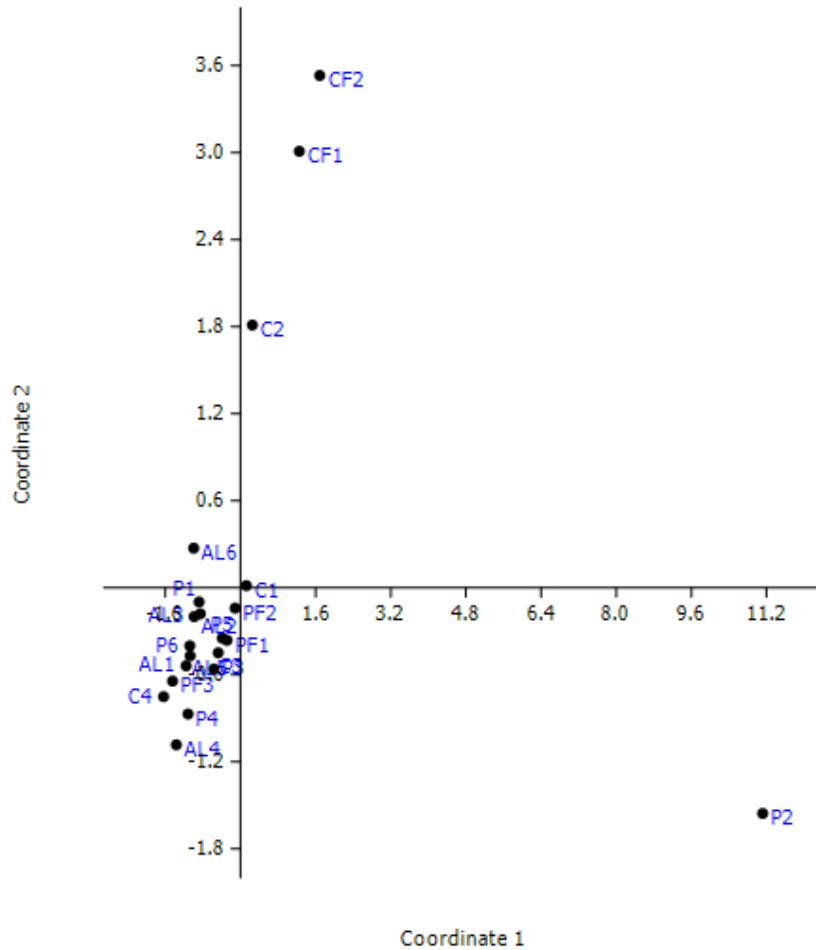

B

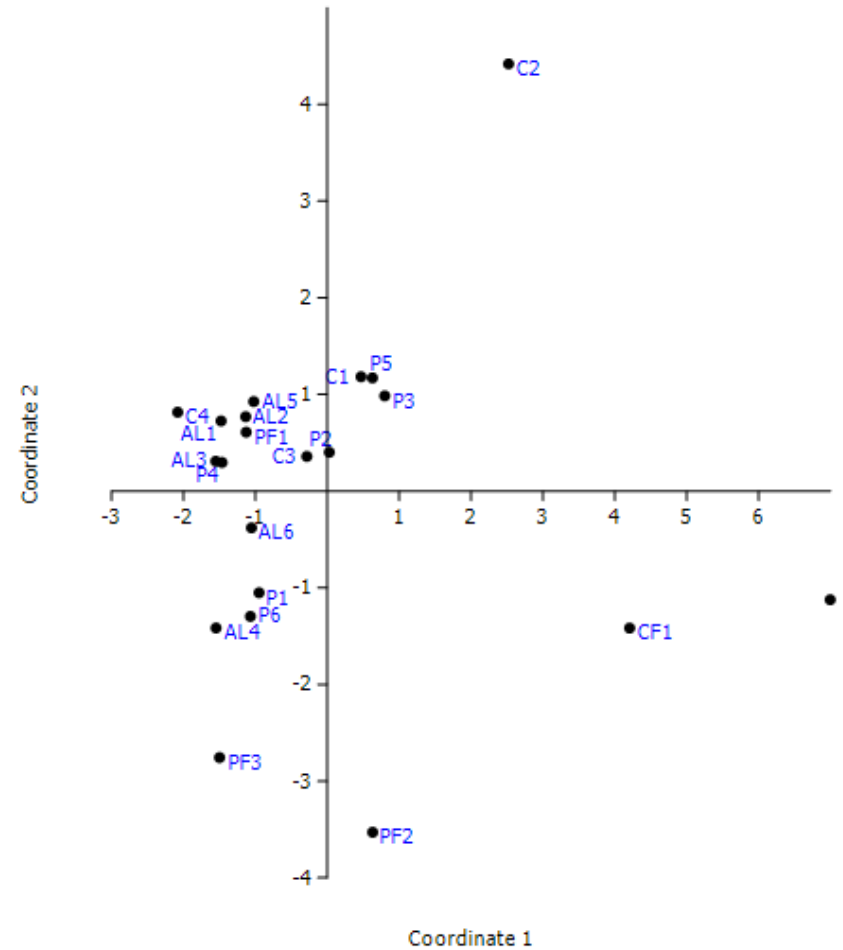

**Fig. S2.** The Principal Coordinate analysis using soil parameters. The Principal coordinates were analyzed and visualized with software package PAST v3.10 using (A) all chemical parameters, (B) all physicochemical parameters, (C) pH and total carbon, and (D) pH, total carbon and total nitrogen.

C

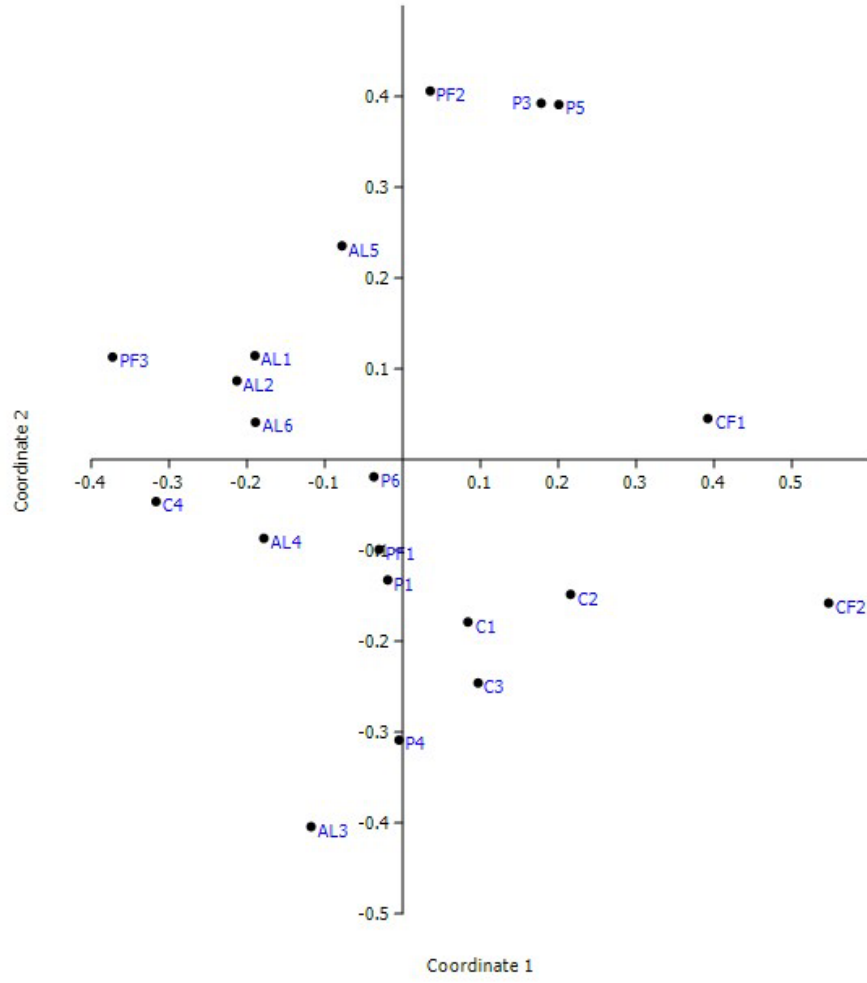

D

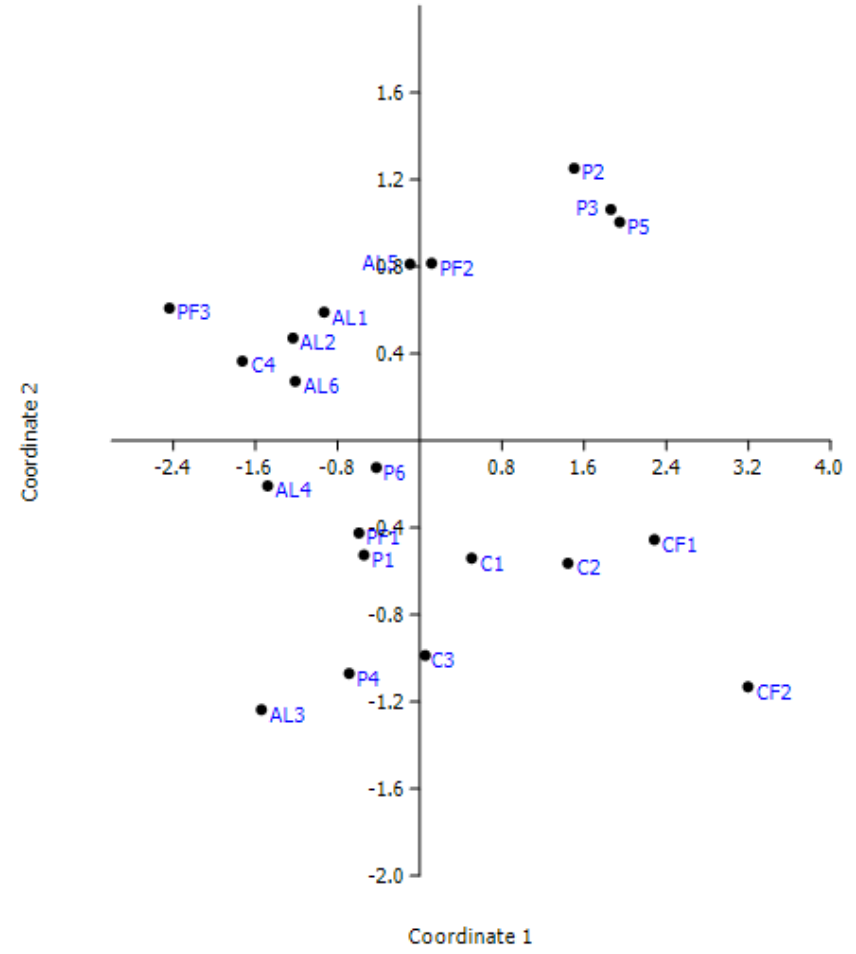

Supplement: 31_160_s1.pdf [file 31_160_s1.pdf]
